# Supplementary material
Source: ML conference proceedings conference paper supplement (https://proceedings.neurips.cc/paper_files/paper/2020/hash/7612936dcc85282c6fa4dd9d4ffe57f1-Abstract.html)
Supplement: Supplementary file [file 7612936dcc85282c6fa4dd9d4ffe57f1-Supplemental.pdf]

# Appendix

## A More experiment details

### A.1 Synthetic experiments

**Baseline configuration** We adapt two most recent techniques for learning EBMs into discrete case, namely Du and Mordatch [1] and Dai et al. [2]. Specifically:

- **PCD based:** Du and Mordatch [1] extends the PCD method with replay buffer and random restart. We adapt these tricks in learning discrete EBMs. Specifically, we use Gibbs sampling for  $K \times 32$ -steps as the MCMC sampler, where  $K$  is set to 10. Instead of always inheriting from previous MCMC samples, we tune the restart rate in  $\{0.05, 0.1, 1\}$ .
- **ADE based:** ADE solves the same minimax problem in Eq (4), but instead directly minimizes the objective  $L(q) := -\mathbb{E}_{x \sim q} [f(x)] - H(q)$ . To make ADE work in discrete case, optimizing  $L(q)$  requires the policy gradient technique with variance reduction [3–6], where the gradient estimator becomes  $\nabla_q L(q) = \mathbb{E}_{x \sim q} \nabla \log q(x) (-f(x) - \log q(x) - 1)$ . This also resembles the learning of GAN [7] on sequences [8] or graphs [9], except the additional entropy regularization term and constant. We use A2C [3] to learn ADE for discrete EBMs. As ADE uses alternating minimization for minimax problem, we tune the learning rate ratio and synchronization frequency between energy function and sampler learning in  $\{0.2, 0.5, 1\}$  and  $\{1 : 1, 1 : 3, 1 : 5\}$ , respectively.

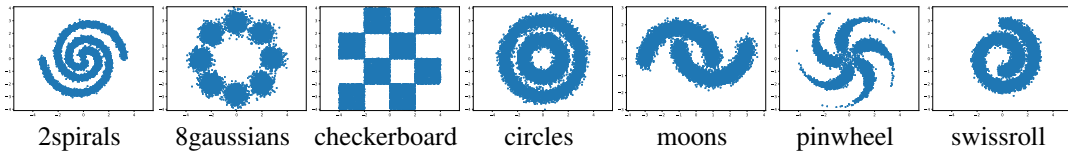

Figure A.1: 2D visualization of samples from the ground truth distribution.

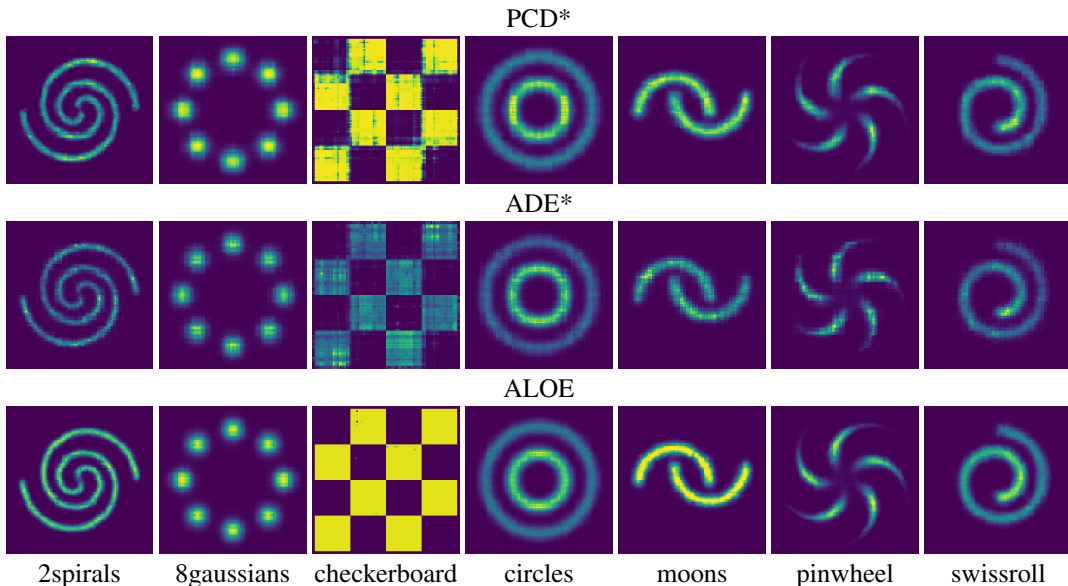

Figure A.2: visualization of learned discrete EBMs using different methods.

**More visualizations** In Figure A.1 we also visualize the samples obtained from the ground truth distribution and visualize them in 2D space. Compared to Figure 2 we can see our learned sampler can almost perfectly recover the true distribution. The checkerboard seems to be the most difficult one among these datasets, as for both PCD and ADE baselines the learned model is much worse than the one learned by ALOE. We find that in this case

23 the distribution is not smooth as it has sharp boundaries for each “square” in the distribu-  
 24 tion. Thus below we study how the learned sampler behaves for ADE algorithm in this case.  
 25 In Figure 3 in main paper we have studied ALOE with  
 26 different design choices of  $q_0$ , where a weak  $q_0$  like  
 27 fully factored distribution can still get reasonable re-  
 28 sults. Instead in Figure A.3 we can see that, for ADE,  
 29 different parameterizations of the sampler will make  
 30 quite different behaviors. The MLP sampler is an au-  
 31 toregressive one with non-sharing parameters, while  
 32 the RNN sampler has the shared parameters across  
 33 different steps. This clearly shows the limitation of  
 34 autoregressive model with parameter sharing, and also  
 35 the necessity of learning sampler with local search to improve the weak initial sampler  $q_0$ .

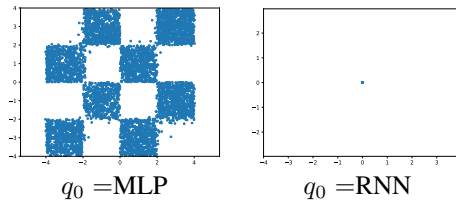

Figure A.3: ADE with different samplers.

36 **Implementation details** Here we provide more details on the instantiation of ALOE on the syn-  
 37 thetic tasks. Below we first cover the parameterization details.

38 The energy function is an MLP with dimensions of  $[32, 256, 256, 256, 1]$ , where 32 is the input size,  
 39 and 256 is the hidden layer size. We use ELU as the activation function.

40 For ADE and ALOE, the  $q_0$  is parameterized with either autoregressive model or a factorized model.  
 41 For the factorized model, we simply learn 32-dimensional vector that represents the logits of each  
 42 dimension independently. For the autoregressive model, there can be two choices. The first one  
 43 uses LSTM (which we denote as `RnnSampler`) to encode the bits, where LSTM has hidden size  
 44 of 256 and 1 layer. All the dimensions share the same predictor that predicts the binary bit from  
 45 the latent embedding obtained by LSTM. The predictor is an MLP with size  $[256, 512, 2]$  with ELU  
 46 activation. Another alternative is to use MLP to encode the bits, as we know the maximum length is  
 47 32 beforehand (which is not practical in general). This way we encode the history using 31 MLPs,  
 48 where the  $i$ -th MLP has size  $[i, 512, 512, 256]$  that embeds the prefix of length  $i$ , and use the shared  
 49 predictor to predict the bit at current position.

50 ALOE has additional components, which are editor  $q_A(\cdot|\cdot)$  and stop policy  $q_{\text{stop}}$ . The editor only  
 51 needs to predict the location for modification, as once the location is given one can simply flip that  
 52 bit. It is parameterized into  $[32, 512, 512, 32]$  with ELU as activation function and softmax at the end.  
 53 The stop policy is parameterized by an MLP with layers  $[32, 512, 512, 1]$  with ELU activation and  
 54 sigmoid in the last output.

55 We use the Inverse proposal where  $A'(\cdot|\cdot)$  is a uniform distribution that samples a random  
 56 location for modification. To avoid sampling the same position twice, we first permute the locations  
 57 and then pick the first  $k$  locations as the proposal trajectory, where  $k$  is the number of edits that is  
 58 sampled from a geometric distribution, with the truncation at 16.

## 59 A.2 Program synthesis experiments

60 **Grammar:** We use the following grammar for RobustFill programs.

61  $\langle \text{program} \rangle \rightarrow \langle \text{ExprList} \rangle$   
 62  $\langle \text{ExprList} \rangle \rightarrow \langle \text{expr} \rangle | \langle \text{expr} \rangle \langle \text{ExprList} \rangle$   
 63  $\langle \text{expr} \rangle \rightarrow \text{'ConstStr'} \langle \text{ConstExpr} \rangle | \text{'SubStr'} \langle \text{SubstrExpr} \rangle$   
 64  $\langle \text{ConstExpr} \rangle \rightarrow \text{'[}' | \text{'}' | \text{'-'}$  |  $\text{'.'}$  |  $\text{'@'}$  |  $\text{'"}$  |  $\text{'('}$  |  $\text{'|'}$  |  $\text{'\%'$   
 65  $\langle \text{SubstrExpr} \rangle \rightarrow \langle \text{Pos} \rangle \langle \text{Pos} \rangle$   
 66  $\langle \text{Pos} \rangle \rightarrow \langle \text{ConstPos} \rangle | \langle \text{RegexPos} \rangle$   
 67  $\langle \text{ConstPos} \rangle \rightarrow -4 | -3 | -2 | -1 | 0 | 1 | 2 | 3 | 4$   
 68  $\langle \text{RegexPos} \rangle \rightarrow \langle \text{ConstTok} \rangle | \langle \text{RegexTok} \rangle$   
 69  $\langle \text{ConstTok} \rangle \rightarrow \langle \text{ConstExpr} \rangle \langle p2 \rangle \langle \text{direct} \rangle$   
 70  $\langle \text{RegexTok} \rangle \rightarrow \langle \text{RegexStr} \rangle \langle p2 \rangle \langle \text{direct} \rangle$   
 71  $\langle p2 \rangle \rightarrow \langle \text{ConstPos} \rangle$   
 72  $\langle \text{direct} \rangle \rightarrow \text{'Start'} | \text{'End'}$

85

86  $\langle RegexStr \rangle \rightarrow '[A-Z]([a-z])+' | '[A-Z]+' | '[a-z]+' | '\d+' | '[a-zA-Z]+' | '[a-zA-Z0-9]+'$   
 87  $| '\s+' | '\^' | '\$'$

88 **Data generator:** We use following configurations for generating synthetic data for program synthesis:

- 89 • The maximum number of types of tokens in input strings is set to 5.
- 90 • The maximum length of input strings is 20.
- 91 • The maximum length of output strings is 50.
- 92 • The total number of input-output examples per synthesis task is 10.
- 93 • The number of public input-output example pairs is 4.
- 94 • The number of private input-output example pairs is 6.

95 The learned synthesizer uses the 4 public IO pairs for synthesize the program, and evaluate against  
 96 all 10 IO pairs. It is considered correct if it is consistent with these 10 IO pairs.

97 **Parameterization:** We use a 3-layer LSTM with hidden size of 256 to encode each input and output  
 98 sequences, respectively. Then each IO pair is represented by concatenating the sequence embeddings  
 99 of input and output strings. The set of inputs is obtained by max-pooling over the IO-pair embeddings,  
 100 which will be served as the context for program synthesis.

101 For  $q_0$  we use a 3-layer LSTM with hidden size of 256 for predicting program tokens. For ALOE we  
 102 parameterize the  $q_A$  with two components: the position predictor  $q_{pos}$  and the modified expression  
 103  $q_{expr}$ .  $q_{pos}$  embeds the current program using 3-layer bidirectional LSTM, and predict the position  
 104 using pointer mechanism [10]. Note that the selected position must be the start or end of an existing  
 105  $\langle expr \rangle$  in above grammar, which indicates whether we want to modify or insert a new  $\langle expr \rangle$   
 106 in this position.  $q_{expr}$  predicts the new expression using another 3-layer LSTM, and is allowed to  
 107 make empty prediction (which corresponds to delete an expression in current program). As the  
 108 program heavily relies on the context free grammar to make it valid, we utilize the technique in  
 109 grammarVAE [11] to mask out invalid production rules during program generation.

### 110 A.3 Fuzzing experiment

| Software | # seed files | file size (bytes) | # training samples for ALOE |
|----------|--------------|-------------------|-----------------------------|
| libpng   | 170          | 104 - 12,901      | 146,507                     |
| openjpeg | 36           | 233 - 7,885,684   | 27,572,688                  |
| libmpeg2 | 131          | 10,581 - 50,000   | 6,119,237                   |

Table A.1: Data statistics for generative fuzzing experiments. We use window size 64 for ALOE to obtain chunks of data from the raw byte streams.

111 **Data statistics:** We test different approaches against three target softwares. The OSS-Fuzz project  
 112 comes with different set of seed inputs for different target softwares. These inputs are served as  
 113 training samples for both ALOE and Godefroid et al. [12], and will be used as seed inputs for  
 114 libFuzzer as well. Table A.1 displays the data statistics. Note that ALOE trains a conditional EBM  
 115 with chunked data from the original raw byte streams, in order to handle huge files. We use chunk  
 116 size 64 by default. Thus for a file with size  $L$  where  $L \geq 64$ , there will be  $L - 64 + 1$  training  
 117 samples for ALOE.

118 **Parameterization:** We use a three-layer MLP to parameterize the energy function, where for the  
 119 input layer, we use embedding size equals to 4 for the byte string. For the negative sampler, we  
 120 parameterize  $q_0$  with LSTM.  $q_A$  consists of two parts, namely  $q_{pos}$  which predicts which position to  
 121 modify using an MLP, and  $q_{value}$  which predicts a new value for that position using another MLP. We  
 122 use Eq (13) for training such EBM.

## 123 References

- 124 [1] Yilun Du and Igor Mordatch. Implicit generation and generalization in energy-based models.  
 125 *arXiv preprint arXiv:1903.08689*, 2019.

- 126 [2] Bo Dai, Zhen Liu, Hanjun Dai, Niao He, Arthur Gretton, Le Song, and Dale Schuurmans.  
127 Exponential family estimation via adversarial dynamics embedding. In *Advances in Neural*  
128 *Information Processing Systems*, pages 10977–10988, 2019.
- 129 [3] Andriy Mnih and Karol Gregor. Neural variational inference and learning in belief networks.  
130 *arXiv preprint arXiv:1402.0030*, 2014.
- 131 [4] Shixiang Gu, Sergey Levine, Ilya Sutskever, and Andriy Mnih. Muprop: Unbiased backpropa-  
132 gation for stochastic neural networks. *arXiv preprint arXiv:1511.05176*, 2015.
- 133 [5] George Tucker, Andriy Mnih, Chris J Maddison, John Lawson, and Jascha Sohl-Dickstein.  
134 Rebar: Low-variance, unbiased gradient estimates for discrete latent variable models. In  
135 *Advances in Neural Information Processing Systems*, pages 2627–2636, 2017.
- 136 [6] Will Grathwohl, Dami Choi, Yuhuai Wu, Geoffrey Roeder, and David Duvenaud. Backpropa-  
137 gation through the void: Optimizing control variates for black-box gradient estimation. *arXiv*  
138 *preprint arXiv:1711.00123*, 2017.
- 139 [7] Ian Goodfellow, Jean Pouget-Abadie, Mehdi Mirza, Bing Xu, David Warde-Farley, Sherjil  
140 Ozair, Aaron Courville, and Yoshua Bengio. Generative adversarial nets. In *Advances in neural*  
141 *information processing systems*, pages 2672–2680, 2014.
- 142 [8] Lantao Yu, Weinan Zhang, Jun Wang, and Yong Yu. Seqgan: Sequence generative adversarial  
143 nets with policy gradient. In *Thirty-First AAAI Conference on Artificial Intelligence*, 2017.
- 144 [9] Nicola De Cao and Thomas Kipf. Molgan: An implicit generative model for small molecular  
145 graphs. *arXiv preprint arXiv:1805.11973*, 2018.
- 146 [10] Oriol Vinyals, Meire Fortunato, and Navdeep Jaitly. Pointer networks. In *Advances in neural*  
147 *information processing systems*, pages 2692–2700, 2015.
- 148 [11] Matt J Kusner, Brooks Paige, and José Miguel Hernández-Lobato. Grammar variational  
149 autoencoder. In *Proceedings of the 34th International Conference on Machine Learning-Volume*  
150 *70*, pages 1945–1954. JMLR. org, 2017.
- 151 [12] Patrice Godefroid, Hila Peleg, and Rishabh Singh. Learn&fuzz: Machine learning for input  
152 fuzzing. In *2017 32nd IEEE/ACM International Conference on Automated Software Engineering*  
153 *(ASE)*, pages 50–59. IEEE.
